# Supplementary material for: Differential Effects of Multiple Dimensions of Poverty on Child Behavioral Problems: Results from the A-CHILD Study
Source: MDPI journal article supplement (doi:10.3390/ijerph182211821), 2021-11-11
Supplement: s1 [file s1]

**Supplemental Figure S1.** Overlap of the three dimensions of poverty

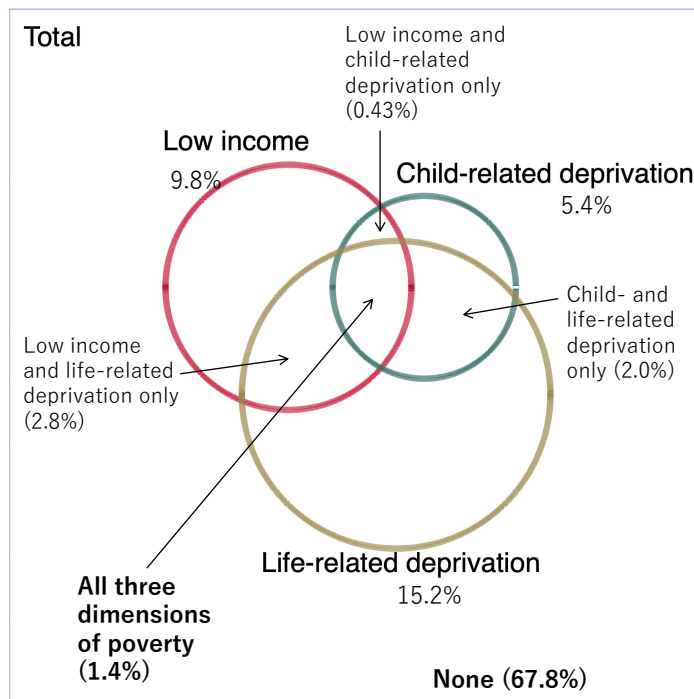

**Supplemental Figure S2.** The structural equation models

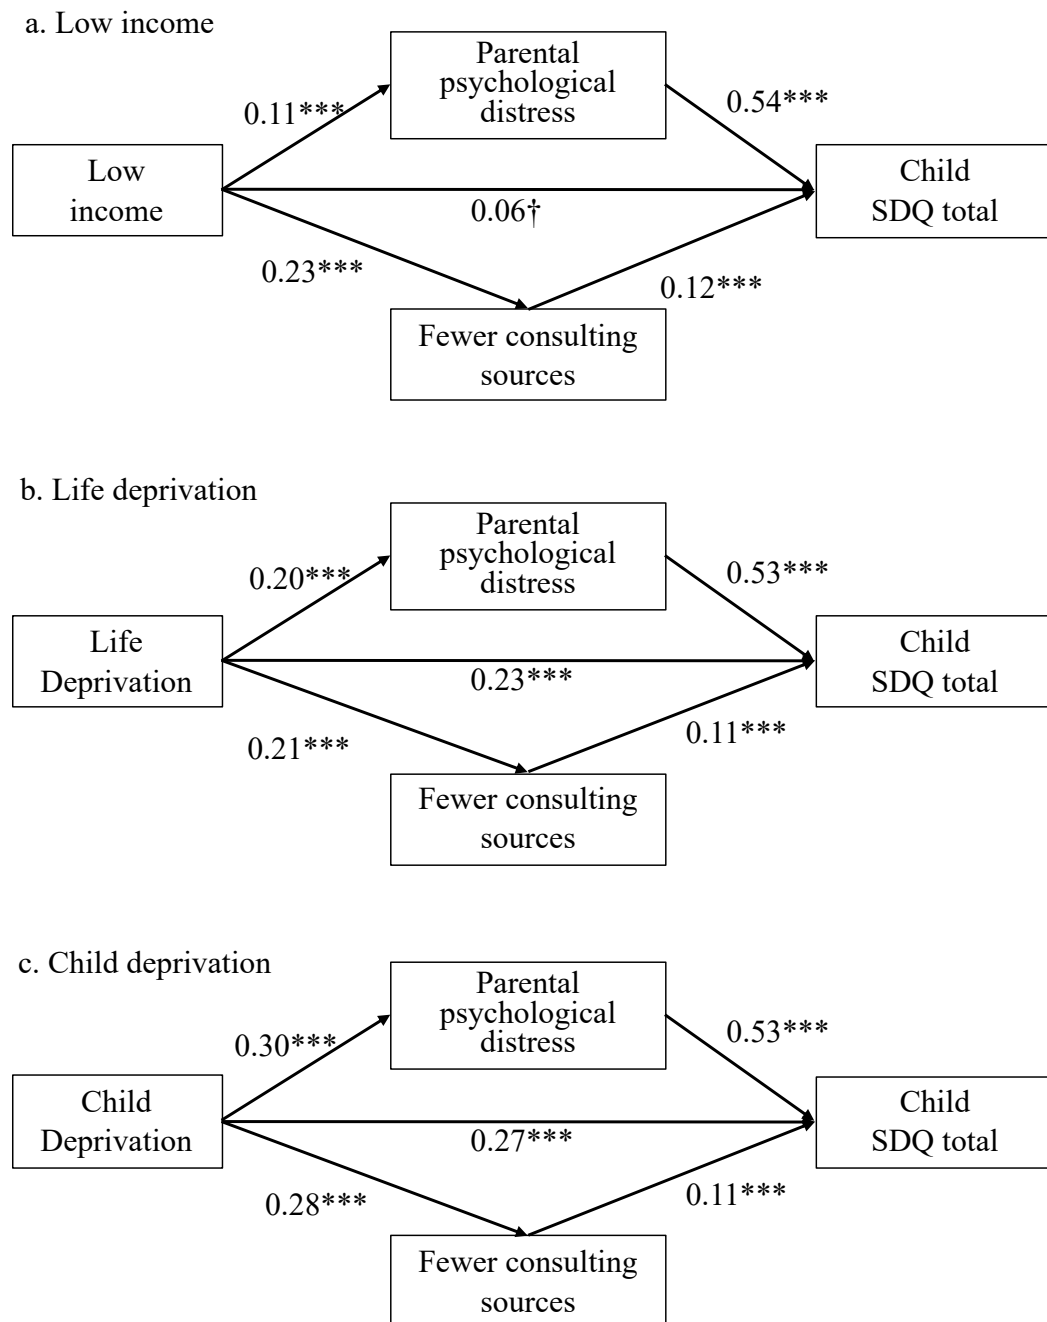

\*\*\*  $p < 0.001$ , \*\*  $p < 0.01$ , \*  $p < 0.05$ , †  $p < 0.01$
